# Supplementary material for: Sour Beer as Bioreservoir of Novel Craft Ale Yeast Cultures
Source: MDPI journal article supplement (doi:10.3390/microorganisms11092138), 2023-08-23
Supplement: s1 [file s1]

# Sour beer as bioreservoir of novel craft ale yeast cultures

Chiara Nasuti <sup>1</sup>, Jennifer Ruffini <sup>1</sup>, Laura Sola <sup>2</sup>, Mario Di Bacco <sup>3</sup>, Stefano Raimondi <sup>2</sup>, Francesco Candeliere <sup>2</sup>, Lisa Solieri <sup>1,4,\*</sup>

- 1 Department of Life Sciences, University of Modena and Reggio Emilia, Via Amendola, 2-Pad. Besta, 42122 Reggio Emilia, Italy; chiara.nasuti@unimore.it (C.N.); 227818@studenti.unimore.it (J.R.)
  - 2 Department of Life Sciences, University of Modena and Reggio Emilia, Via Campi 51, 41125 Modena, Italy; laura.sola@unimore.it (L.S.); stefano.raimondi@unimore.it (S.R.); francesco.candeliere@unimore.it (F.C.)
  - 3 Ca' Del Brado Brewery, Via Andrea Costa, 146/2, 40065 Rastignano, Italy; quark@cadelbrado.it
  - 4 National Biodiversity Future Center (NBFC), 90133 Palermo, Italy
- \* Correspondence: L.S.: lisa.solieri@unimore.it; Tel.: +39 0522522026

## Supplementary Data

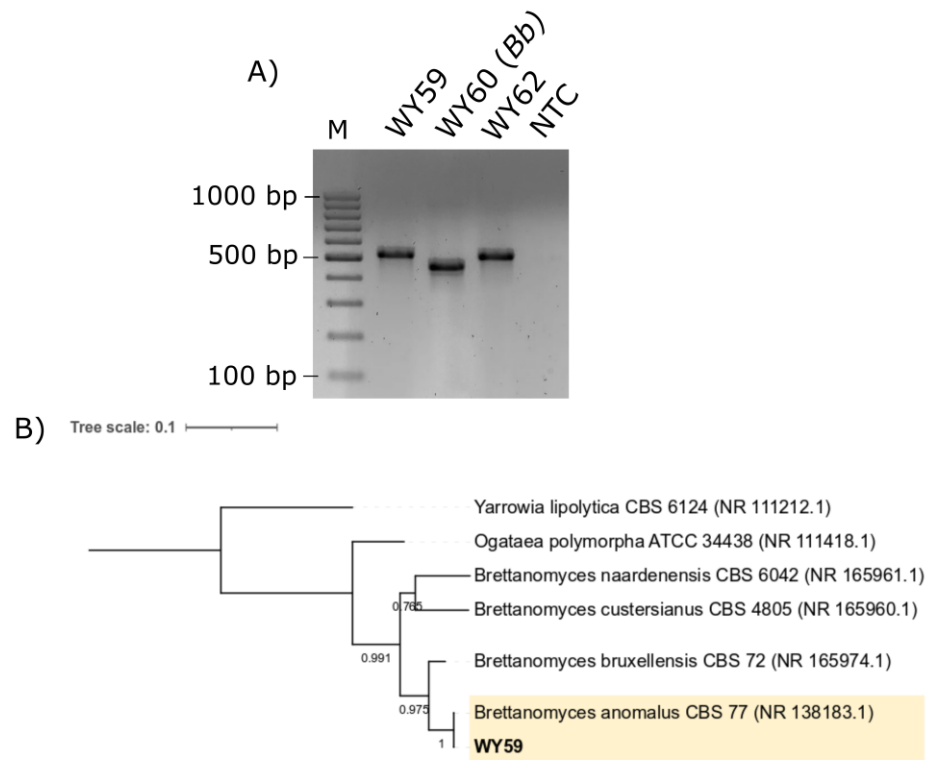

**Supplementary Figure S1.** Analysis of ITS region in *D. anomala* isolates. (A) Electrophoretic gel of ITS amplicons. *D. bruxellensis* strain WY60 was used as reference strain. (B) Phylogenetic tree obtained by neighbor joining (NJ) method [1] applied to a dataset of 7 rDNA sequences. The evolutionary distances were calculated by the Tamura 3-parameter method [2] considering the number of nucleotide substitutions per site. The gamma distribution was used to model the rate of change between sites. All positions containing gaps and missing data were eliminated (complete deletion option). The percentage of replicate trees in which the associated taxa clustered together in the bootstrap test [3] (1000 replicates) are shown next to the branches. The strain collected in this study is shown in bold. The lengths of the branches are proportional to the number of nucleotide substitutions, and they have been measured using the divergence scale shown at the top left. The tree was rooted using *Yarrowia lipolytica* as outgroup. The tree data (Newick) were generated with MegaX [4] and exported and visualized using ITOL [5]. Abbreviation: M: molecular size marker; Bb: *Brettanomyces bruxellensis*.

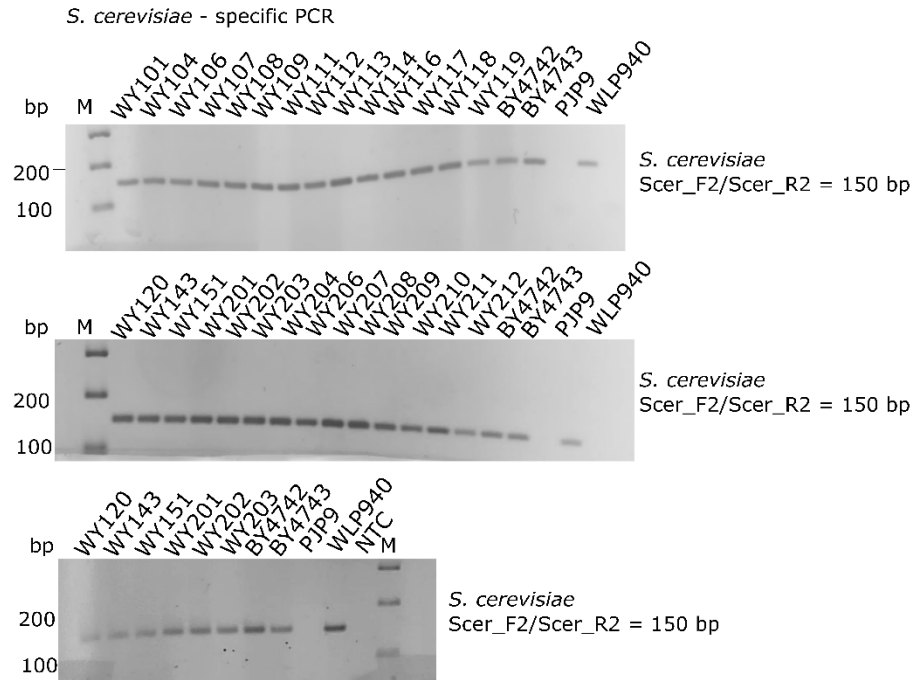

**Supplementary Figure S2.** *Saccharomyces cerevisiae*-specific PCRs of 35 isolates with pattern A in PCR-RFLP analysis of ITS regions. *S. cerevisiae*-specific PCR assay was carried out with Scer\_F2/Scer\_R2 primers targeting *MEX67* gene (amplicon size 150 bp). *S. cerevisiae* BY4742 and BY4743, *S. uvarum* PJP9, and lager strain WLP940 were used as internal control. Abbreviations: M, molecular weight marker; NTC, negative control.

### *S. bayanus* - specific PCR

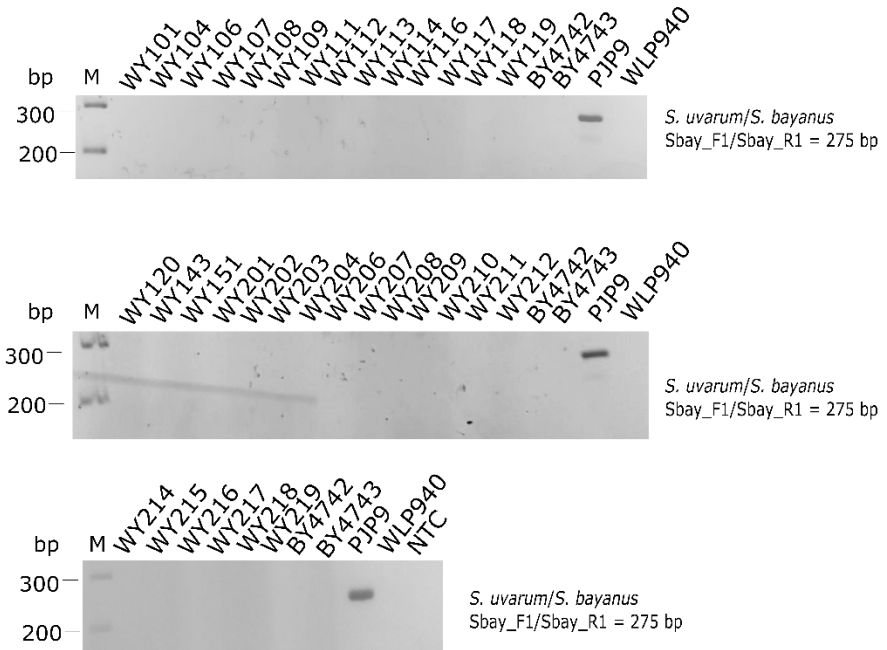

**Supplementary Figure S3.** *Saccharomyces bayanus*/*S. uvarum*-specific PCRs of 35 isolates with pattern A in PCR-RFLP analysis of ITS regions. *S. bayanus*-specific PCR assay was carried out with Sbay\_F1/Sbay\_R1 primers targeting *DBP6* gene (amplicon size 275 bp). *S. cerevisiae* BY4742 and BY4743, *S. uvarum* PJP9, and lager strain WLP940 were used as internal control. Abbreviations: M, molecular weight marker; NTC, negative control.

### *S. eubayanus* - specific PCR

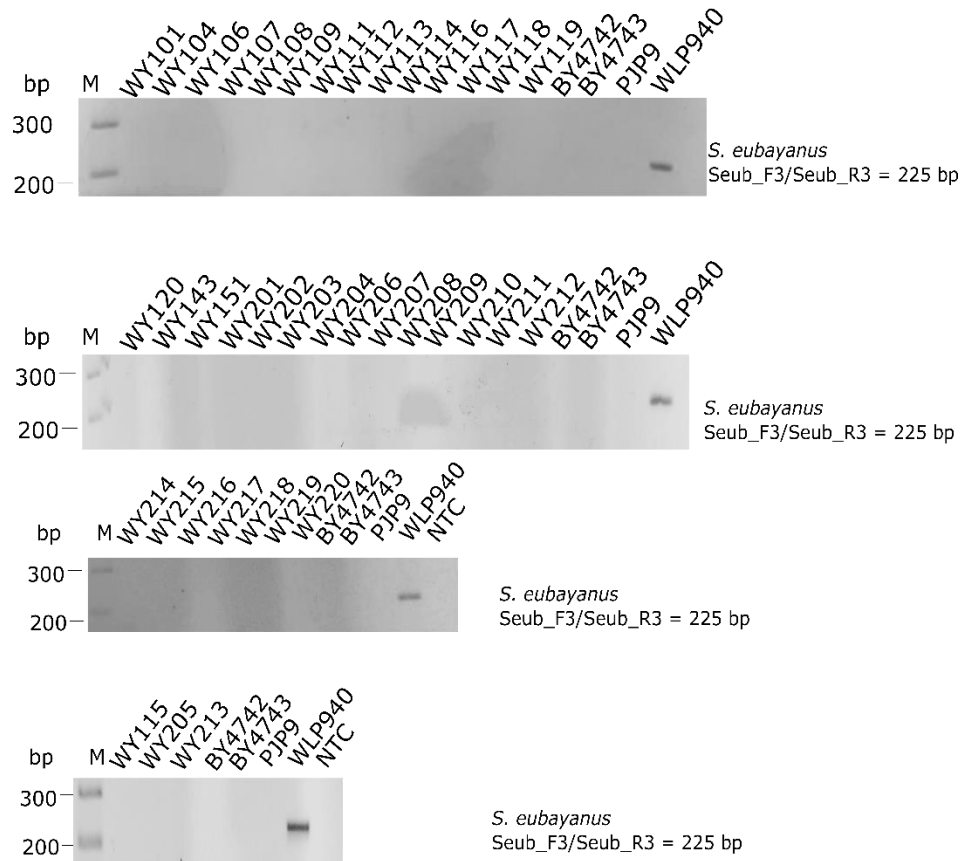

**Supplementary Figure S4.** *Saccharomyces eubayanus*-specific PCRs of 35 isolates with pattern A in PCR-RFLP analysis of ITS regions and of three putative *S. cerevisiae* x *S. uvarum* hybrids. *S. eubayanus*-specific PCR assay was carried out with Seub\_F3/Seub\_R3 primers targeting *FSY1* gene (amplicon size 228 bp). *S. cerevisiae* BY4742 and BY4743, *S. uvarum* PJP9, and lager strain WLP940 were used as internal control. Abbreviations: M, molecular weight marker; NTC, negative control.

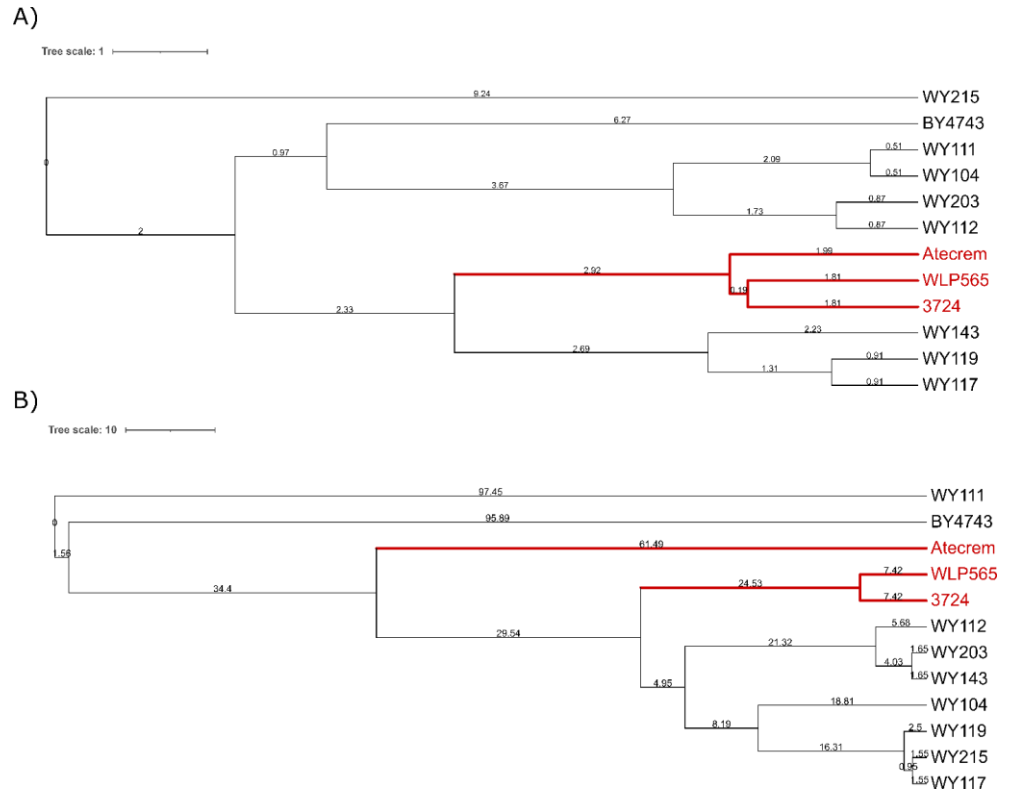

**Supplementary Figure S5.** Dendrograms generated using inter-delta PCR (A) and R3-RAPD PCR (B) fingerprints of 11 *S. cerevisiae* strains (7 indigenous wild strains isolated in this study from sour beer, 3 commercial starter cultures commonly used in the brewery plant, and BY4743 as reference strain). Commercial starters (in red) were detailed in Table 1. Similarity percentages were calculated using Pearson correlation coefficient, while hierarchical clustering analysis was carried out using the UPGMA (unweighted pair-group method with arithmetic mean) method with Bionumerics software. Numbers near the branches represent branch lengths. The tree data (Newick) were generated with MegaX [4] and exported and visualized using ITOL [5].

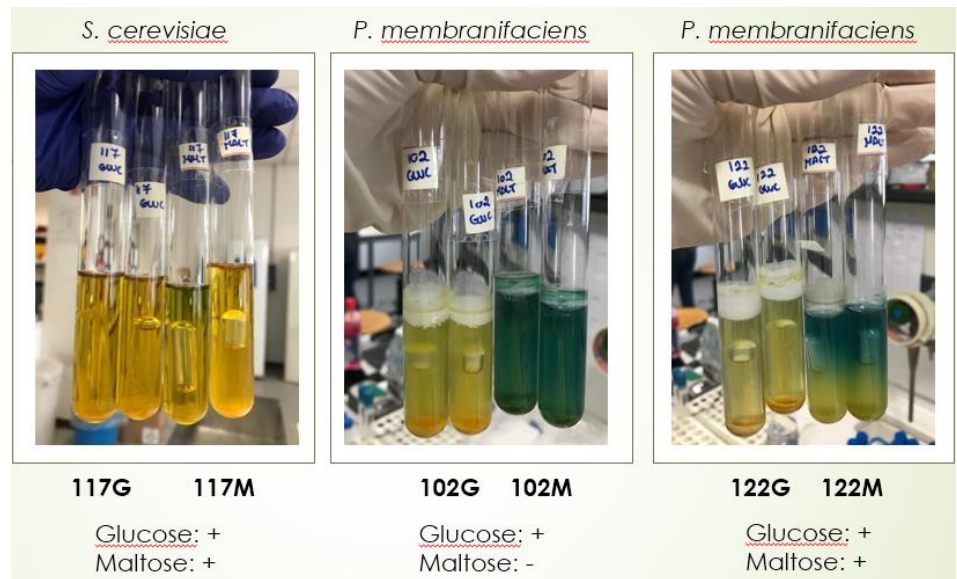

**Supplementary Figure S6.** Glucose and maltose fermentation test. Tubes containing Durham inverted tubes were photographed after 3 days of incubation at 27°C. Tests were carried out according to Kurtzman et al. [6]. Abbreviations: G, glucose; M, maltose.

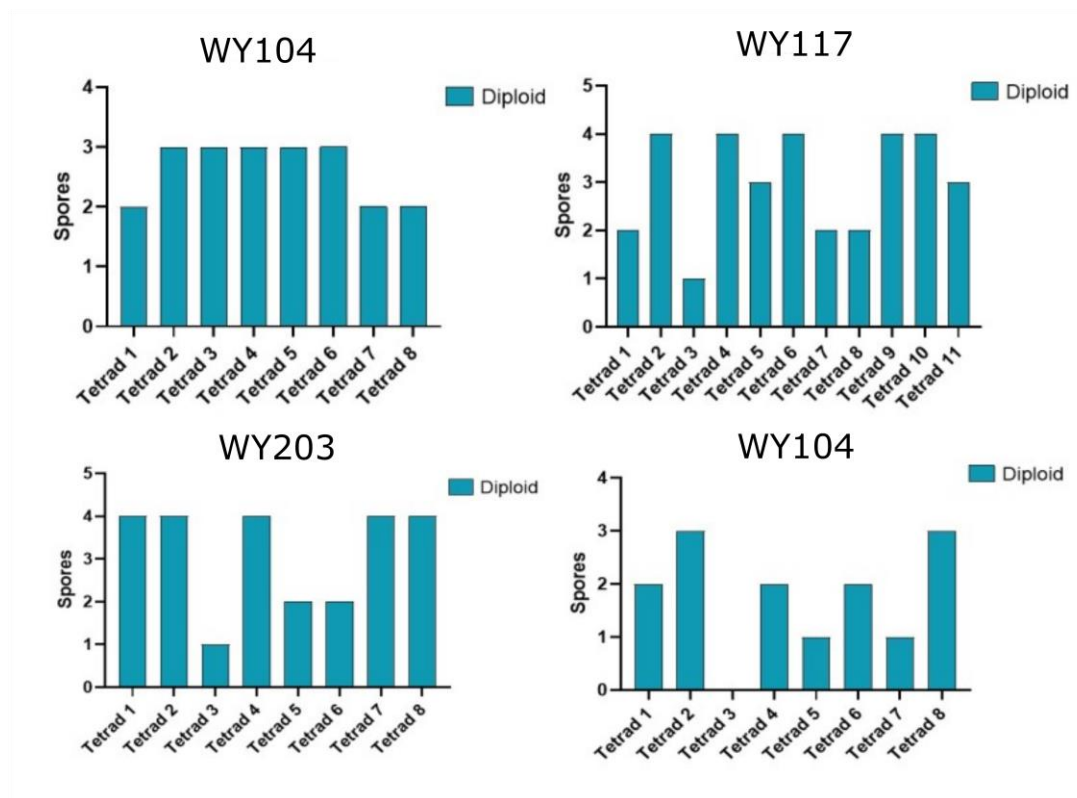

**Supplementary Figure S7.** Mating type genotyping of four *S. cerevisiae* sour beer wild strains and their monosporic derivatives. For each strain at least 8 meiotic events (asci) were dissected.



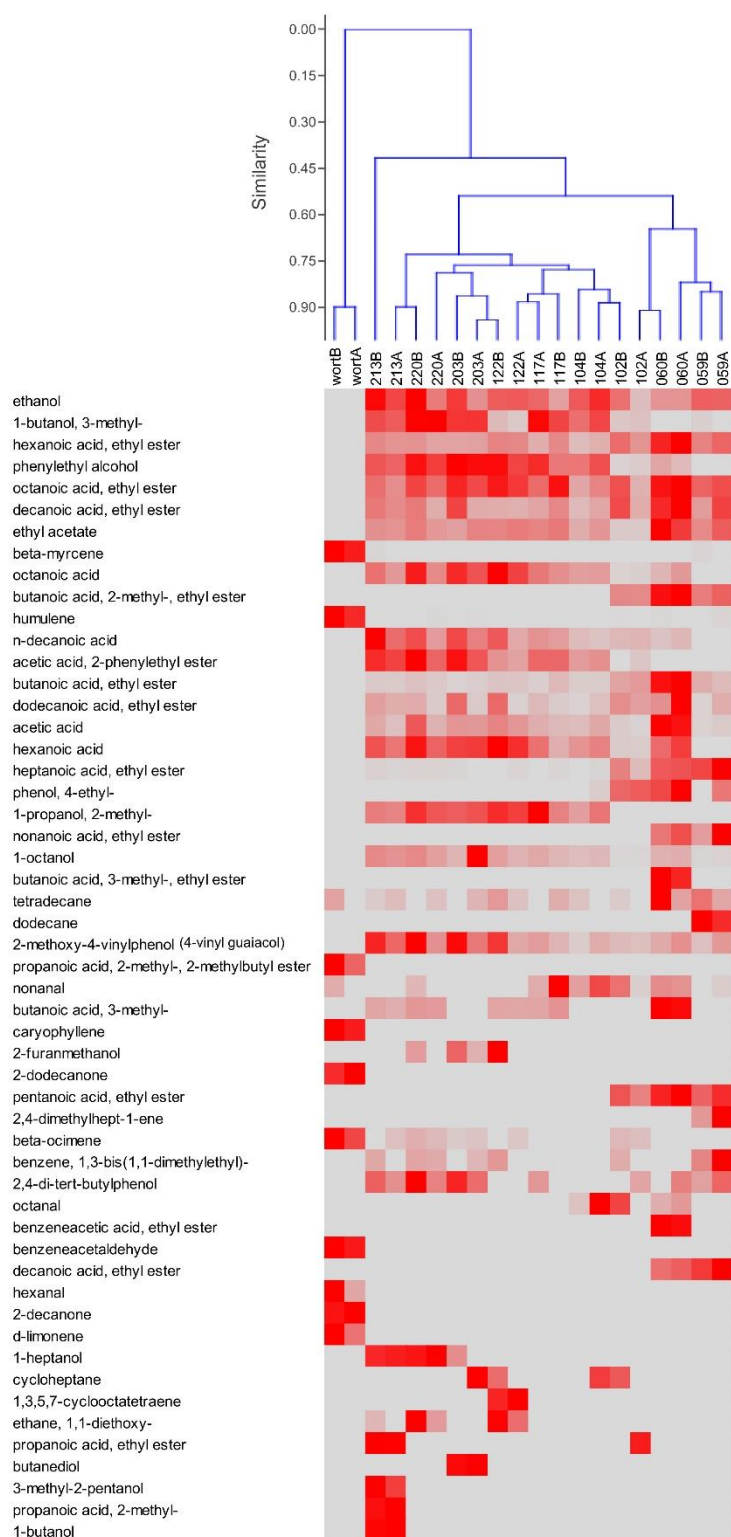

**Supplementary Figure S8.** Distribution of the 53 volatile organic compounds (VOCs), identified in the headspace of the fermented wort samples. To highlight the differences between samples in terms of the presence of each single VOC, rather than the relative abundance of all VOCs in a single sample, the area values of each VOC were mean centered and normalized by the corresponding standard deviation. Values are reported as colors, ranging from the lowest of each lane (grey) to the highest (deepest red).



Supplementary Table S1. Primers, compound concentrations, and thermal conditions used this study.

| Goal                 | Gene Target | Primer name        | Sequence (5'→3')                                    | Cycling conditions                                                                                                     | Reaction mixture                                                                                                                                                      | Reference |
|----------------------|-------------|--------------------|-----------------------------------------------------|------------------------------------------------------------------------------------------------------------------------|-----------------------------------------------------------------------------------------------------------------------------------------------------------------------|-----------|
|                      |             |                    |                                                     |                                                                                                                        | Vf Compounds<br>(μL )                                                                                                                                                 |           |
| Yeast identification | ITS region  | ITS1               | TCCGTAGGTGAACCTGCGG                                 | 95 °C for 5 min; (95 °C for 1 min, 55 °C for 2 min, 72 °C for 2 min) <sup>35</sup> ; 72 °C for 10 min                  | 1X Dream Taq Green [7]<br>Buffer, 2.0 mM MgCl <sub>2</sub> , 200 μM of each dNTP, 0.3 μM of each primer, 1 U of Dream Taq DNA polymerase, 100 ng DNA template         |           |
|                      |             | ITS4               | TCCTCCGCTTATTGATATGC                                |                                                                                                                        |                                                                                                                                                                       |           |
|                      | 26S LSU     | NL1                | GCATATCAATAAGCGGAGGAAAAG                            | 94 °C for 5 min; 36 cycles of 40 94 °C for 1 min, 52 °C for 45 s, 72 °C for 2 min; final extension at 72 °C for 10 min | 1X TaKaRa ExTaq [8]<br>Buffer*, 2.0 μM MgCl <sub>2</sub> , 200 μM of each dNTP, 0.3 μM of each primer, 1 U of TaKaRa ExTaq DNA polymerase, and 100 ng of template DNA |           |
|                      |             | NL4                | GGTCCGTGTTTCAAGACGG-                                |                                                                                                                        |                                                                                                                                                                       |           |
|                      | DBP6        | Sbay_F1<br>Sbay_R1 | GCTGACTGCTGCTGCTGCCCCCG<br>TGTTATGAGTACTTGGTTTGTCTG | 95°C for 3 min, (95°C for 30 20 sec, 58°C for 30 sec, 72°C for 1 min) <sup>35</sup> ; 72°C for 7 min                   | 1X Dream Taq Green [9]<br>Buffer, 2 mM MgCl <sub>2</sub> , 200 μM of each dNTP, 0.4 μM of Sbay_F1, 0.8 μM Sbay_R1, 0.5U Dream Taq DNA polymerase, 50 ng DNA template  |           |
|                      | MEX67       | Scer_F2<br>Scer_R2 | GCGCTTTACATTTCAGATCCCGAG<br>TAAGTTGGTTGTCAGCAAGATTG | 95°C for 3 min, (95°C for 30 20 sec, 58°C for 30 sec, 72°C for 1 min) <sup>35</sup> ; 72°C for 7 min                   | 1X Dream Taq Green [9]<br>Buffer, 2 mM MgCl <sub>2</sub> , 200 μM of each dNTP, 0.4 μM of each primer, 0.5U Dream Taq DNA                                             |           |

|                     |                                      |                    |                                                                |                                                                                                       |                                                                                                                                                                                                              |
|---------------------|--------------------------------------|--------------------|----------------------------------------------------------------|-------------------------------------------------------------------------------------------------------|--------------------------------------------------------------------------------------------------------------------------------------------------------------------------------------------------------------|
|                     | <i>FSY1</i>                          | Seub_F3<br>Seub_R3 | GTCCCTGTACCAATTTAATATTGCGC<br>TTTCACATCTCTTAGTCTTTTCCAGAC<br>G | 95°C for 3 min, (95°C for 30 sec, 60°C for 30 sec, 72°C for 1 min) <sup>35</sup> ; 72°C for 7 min     | polymerase, 50 ng<br>DNA template<br>1X Dream Taq Green [9]<br>Buffer, 2 mM MgCl <sub>2</sub> ,<br>200 µM of each dNTP,<br>0.4 µM of each primer,<br>0.5U Dream Taq DNA<br>polymerase, 50 ng<br>DNA template |
| Yeast<br>genotyping | Microsatellite<br>(GTG) <sub>5</sub> | (GTG) <sub>5</sub> | GTGGTGGTGGTGGTG                                                | 94 °C for 5 min; (94 °C for 15 s, 55 °C for 45 s, 72 °C for 1.30 min) <sup>40</sup> ; 72 °C for 4 min | 1X Dream Taq Green [10]<br>Buffer, 3 mM MgCl <sub>2</sub> ,<br>200 µM of each dNTP,<br>0.6 µM of primer, 200<br>mM BSA, 0.5U Dream<br>Taq DNA polymerase,<br>50 ng DNA template                              |
|                     | Random DNA                           | R3                 | ATGCAGCCAC                                                     | 94°C for 4 min; (94°C for 25 sec, 42 C for 30 sec, 72 °C for 90 sec); 72°C for 5 min                  | 1X Dream Taq Green [11]<br>Buffer, 3.0 mM MgCl <sub>2</sub> ,<br>200 µM of each dNTP,<br>1 µM of primer, 0.5<br>U/µL of Dream Taq<br>DNA polymerase, 50<br>ng DNA template                                   |
|                     | Transposable<br>elements Ty2         | d12<br>d21         | TCAACAATGGAATCCCAAC<br>CATCTTAACACCGTATATGA                    | 95°C for 5 min; (95°C for 30 s min, 46°C for 30 s, 72°C for 90 s) <sup>35</sup> ; 72°C for 10 min     | 1X Dream Taq Green [12]<br>Buffer, 2.5 mM MgCl <sub>2</sub> ,<br>200 µM of each dNTP,<br>1 µM of primer,<br>0.625U Dream Taq<br>DNA polymerase, 50<br>ng DNA template                                        |
| <i>STA1</i>         | <i>STA1</i>                          | SD-5A<br>SD-6B     | CAACTACGACTTCTGTCATA<br>GATGGTGACGCAATCACGA                    | 95°C for 3 min; (95°C for 30 sec, 60°C for 30 sec, 72°C for 1 min) <sup>35</sup> ; 72°C for 7 min     | 1X Dream Taq Green [13]<br>Buffer, 2 mM MgCl <sub>2</sub> ,<br>200 µM of each dNTP,<br>0.4 µM of primer, 0.5U<br>Dream Taq DNA                                                                               |

|                    |                                   |                            |                                                                             |                                                                                                        |                                                                                                                                                                                                          |
|--------------------|-----------------------------------|----------------------------|-----------------------------------------------------------------------------|--------------------------------------------------------------------------------------------------------|----------------------------------------------------------------------------------------------------------------------------------------------------------------------------------------------------------|
|                    | STA1 UAS2 promoter                | STA1_UAS_Fw<br>STA1_UAS_Rv | CCTGGCTCAAATTAACTTTTCG<br>ACCACCAATAGGCAATAGAAA                             | 95°C for 3 min; (95°C for 30 sec, 56°C for 30 sec, 72°C for 1 min) <sup>35</sup> ; 72°C for 7 min      | polymerase, 50 ng<br>DNA template<br>1X Dream Taq Green [14]<br>Buffer, 2 mM MgCl <sub>2</sub> ,<br>200 µM of each dNTP,<br>0.4 µM of primer, 0.5U<br>Dream Taq DNA<br>polymerase, 50 ng<br>DNA template |
| LAB identification | 16S rRNA                          | 27f<br><br>1490r           | TCCATTTACTCGAGAGTTTGATCCTGG<br>CTCAG<br>GGTTCCCCTAAGCTTACCTTGTTACG<br>ACTTC | 95 °C for 5 min; (95 °C for 1 min, 58 °C for 2.5 min, 72 °C for 2 min) <sup>30</sup> ; 72 °C for 5 min | 1X TaKaRa <i>ExTaq</i> [15]<br>Buffer*, 2.0 µM MgCl <sub>2</sub> ,<br>200 µM of each dNTP,<br>0.2 µM of each primer,<br>1 U of TaKaRa <i>ExTaq</i><br>DNA polymerase, and<br>100 ng of template<br>DNA   |
| LAB genotyping     | Microsatellite (GTG) <sub>5</sub> | (GTG) <sub>5</sub>         | GTGGTG GTGGTG GTG                                                           | 94 °C for 5 min; (94 °C for 15 s, 55 °C for 45 s, 72 °C for 1.30 min) <sup>40</sup> ; 72 °C for 4 min  | 1X Dream Taq Green [16]<br>Buffer, 3 mM MgCl <sub>2</sub> ,<br>200 µM of each dNTP,<br>0.6 µM of primer, 200<br>mM BSA, 0.5U Dream<br>Taq DNA polymerase,<br>50 ng DNA template                          |

---

**Supplementary Table S2.** *In silico* 16S-ARDRA profiles of the main beer LAB species.

| Species                                    | Accession number | <i>TruII</i> <sup>1</sup>                                 | <i>HhaI</i>             | <i>HinfI</i>          |
|--------------------------------------------|------------------|-----------------------------------------------------------|-------------------------|-----------------------|
| <i>Levilactobacillus brevis</i>            | HM058775.1       | 467, 259, 252, 194, 134, 104, 86, 47, 26                  | 367, 500, 571           | 274, 891, 85, 58      |
| <i>Fructilactobacillus lindneri</i>        | CP014907.1       | 109, 150, 44, 86, 48, 86, 252, 534                        | 289, 528, 492           | 55, 976, 278          |
| <i>Lentilactobacillus buchneri</i>         | M58811           | 421, 252, 200, 194, 134, 123, 111, 86                     | 400, 500, 580           | 785-540-135           |
| <i>Lactiactobacillus casei</i>             | D16551           | 464, 252, 239, 194, 134, 86, 81, 46, 26                   | 580, 450, 400, 380, 210 | 1000, 145             |
| <i>Loigolactobacillus coryniformis</i>     | MF114100.1       | 465, 255, 206, 194, 156, 134, 86, 26                      | 496, 528, 287           | 976, 277, 58          |
| <i>Secundilactobacillus malefermentans</i> | NR_113822.1      | 505, 278, 86, 134, 44, 150, 111                           | 1021, 287               | 493, 398, 274, 85, 58 |
| <i>Latilactobacillus curvatus</i>          | CP017124.1       | 593, 278, 161, 134, 86                                    | 528, 495, 287           | 976, 251, 58, 25      |
| <i>Pediococcus damnosus</i>                | D87678           | 423, 254, 206, 200, 137, 134, 86, 44, 13                  | 528, 507, 287           | 976, 263, 58, 25      |
| <i>Pediococcus acidilactici</i>            | M58833           | 278, 243, 205, 194, 134, 120, 104, 86, 79, 47, 36         | 500, 400, 320, 260      | 710, 380, 190         |
| <i>Pediococcus pentosaceus</i>             | AB362986.1       | 278, 269, 243, 137, 134, 120, 104, 86, 80, 47, 44, 36, 13 | 528, 507, 287           | 1000, 145             |
| <i>Pediococcus inopitalus</i>              | AJ271383         | 395, 252, 247, 137, 134, 121, 96, 86, 44, 26, 13          | 507, 528, 287           | 976, 263, 58, 25      |
| <i>Pediococcus parvulus</i>                | D88528           | 395, 252, 182, 178, 150, 134, 86, 44, 26                  | 568, 526, 345           | 976, 263, 58, 25      |

<sup>1</sup> Fragments were in bp.

Supplementary Table S3. ITS RFLP-PCR analysis of yeast isolates from natural sour beer.

| Isolation condition | Strain                                                                                                                                                     | Amplicon size <sup>1</sup> | Restriction profile |               | Yeast-ID best matching (%)                                                                                                                                       | Pattern |
|---------------------|------------------------------------------------------------------------------------------------------------------------------------------------------------|----------------------------|---------------------|---------------|------------------------------------------------------------------------------------------------------------------------------------------------------------------|---------|
|                     |                                                                                                                                                            |                            | <i>Hae</i> III      | <i>Hin</i> fl |                                                                                                                                                                  |         |
| YPDA<br>28 °C       | WY201, WY202, <b>WY203</b> ,<br>WY204, WY206, WY207,<br>WY208, WY209, WY210,<br>WY211, WY212, WY214,<br>WY215, WY216, WY217,<br>WY218, WY219, <b>WY220</b> | 850                        | 125, 170, 230, 325  | 110, 365, 375 | <i>Saccharomyces cerevisiae</i><br>(100%)/ <i>Saccharomyces coriocanus</i><br>(100%)/ <i>Saccharomyces paradoxus</i> (100%)                                      | A       |
|                     | <b>WY205</b> , WY213                                                                                                                                       | 850                        | 125, 230, 495       | 150, 365, 375 | <i>Saccharomyces bayanus</i><br>(89%)/ <i>Saccharomyces kudriavzevii</i><br>(89%)/ <i>Saccharomyces pastorianus</i><br>(89%)/ <i>Saccharomyces mikatae</i> (89%) | C       |
| WL 28 °C            | WY101, <b>WY104</b> , WY106,<br>WY107, WY108, WY109,<br>WY111, WY112, WY113,<br>WY114, WY116, <b>WY117</b> ,<br>WY118, WY119, WY120,<br>WY143, WY151       | 850                        | 125, 170, 230, 325  | 110, 365, 375 | <i>Saccharomyces cerevisiae</i><br>(100%)/ <i>Saccharomyces coriocanus</i><br>(100%)/ <i>Saccharomyces paradoxus</i> (100%)                                      | A       |
|                     | <b>WY115</b>                                                                                                                                               | 850                        | 125, 230, 495       | 150, 365, 375 | <i>Saccharomyces bayanus</i><br>(89%)/ <i>Saccharomyces kudriavzevii</i><br>(89%)/ <i>Saccharomyces pastorianus</i><br>(89%)/ <i>Saccharomyces mikatae</i> (89%) | C       |
|                     | <b>WY102</b> , WY103, WY105,<br>WY110, WY121, <b>WY122</b> ,<br>WY141, WY152                                                                               | 485                        | 48, 84, 336         | 203, 282      | <i>Pichia membranifaciens</i> (73%)                                                                                                                              | B       |
|                     | <b>WY59</b> , WY62                                                                                                                                         | 550                        | 110, 400            | 95, 230       | <i>Kluyveromyces blattae</i> (67%)                                                                                                                               | D       |
|                     | <b>WY60</b> , WY61                                                                                                                                         | 490                        | 100, 350            | 210, 280      | <i>Dekkera bruxellensis</i> (83%)                                                                                                                                | E       |

<sup>1</sup> Amplicons and restriction fragments were in bp.

## References

1. Saitou, N.; Nei M. The neighbor-joining method: A new method for reconstructing phylogenetic trees. *Mol. Biol. Evol.*, **1987**, *4*, 406-425.
2. Tamura, K. Estimation of the number of nucleotide substitutions when there are strong transition-transversion and G + C-content biases. *Mol. Biol. Evol.* **1992**, *9*, 678-687.
3. Felsenstein, J. Confidence limits on phylogenies: An approach using the bootstrap. *Evolution*, **1985**, *39*, 783-791.
4. Kumar, S.; Stecher, G.; Li, M.; Knyaz, C.; Tamura, K. MEGA X: Molecular evolutionary genetics analysis across computing platforms. *Mol. Biol. Evol.* **2018**, *35*, 1547-1549
5. Letunic, I.; Bork, P. Interactive Tree of Life (iTOL) v4: Recent updates and new developments. *Nucleic Acids Res.* **2019**, *2*, 256-259.
6. Kurtzman, C.P., Fell, J.W., Boekhout, T.; Robert, V. Methods for isolation, phenotypic characterization and maintenance of yeasts. In *The yeasts*, 5th ed; Kurtzman, C.P.; Fell, J.W.; Boekhout, T., Eds.; Elsevier, Amsterdam, **2011**, pp. 87-110.
7. White, T.J.; Bruns, T.; Lee, S.; Taylor, J. Amplification and direct sequencing of fungal ribosomal RNA genes for phylogenetics. In *PCR Protocols: A Guide to Methods and Applications*; Innis, M.A., Gelfand, D.H., Sninsky, J.J., White, T.J., Eds.; Academic Press: San Diego, CA, USA, **1990**; pp. 315-322.
8. Kurtzman, C.P.; Robnett, C.J. Identification and phylogeny of ascomycetous yeasts from analysis of nuclear large subunit (26S) ribosomal DNA partial sequences. *Antonie Leeuwenhoek*, **1998**, *73*, 331-371.
9. Pengelly, R.J.; Wheals, A.E. Rapid identification of *Saccharomyces eubayanus* and its hybrids. *FEMS Yeast Res.*, **2013**, *13*, 156-161.
10. Dakal, T.C.; Solieri, L.; Giudici, P. Evaluation of fingerprinting techniques to assess genotype variation among *Zygosaccharomyces* strains. *Food Microbiol.* **2018**, *72*, 135-145.
11. Corte, L.; Lattanzi, M.; Buzzini, P.; Bolano, A.; Fatichenti, F.; Cardinali, G. Use of RAPD and killer toxin sensitivity in *Saccharomyces cerevisiae* strain typing. *J. Appl. Microbiol.* **2005**, *99*, 609-617.
12. Legras, J.-L.; Karst, F. Optimisation of interdelta analysis for *Saccharomyces cerevisiae* strain characterisation. *FEMS Microbiol. Lett.* **2003**, *221*, 2249-2255.
13. Yamauchi, H.; Yamamoto, H.; Shibano, Y.; Amaya, N.; Saeki, T. Rapid methods for detecting *Saccharomyces diastaticus*, a beer spoilage yeast, using the polymerase chain reaction. *J. Am. Soc. Brew. Chem.* **1998**, *56*, 58-63.
14. Krogerus, K.; Magalhães, F.; Kuivanen, J. *et al.* A deletion in the *STA1* promoter determines maltotriose and starch utilization in *STA1+* *Saccharomyces cerevisiae* strains. *Appl Microbiol Biotechnol.* **2019**, *103*, 7597-7615.
15. Lane, D. J. 16S/23S rRNA sequencing. In *Nucleic Acid Techniques in Bacterial Systematics*; Stackebrandt, E.; Goodfellow, M., Eds; John Wiley & Sons: New York, NY, USA, **1991**; pp. 115-175.
16. Solieri, L.; Bianchi, A.; Giudici, P. Inventory of non-starter lactic acid bacteria from ripened Parmigiano-Reggiano cheese as assessed by a culture dependent multiphasic approach. *Syst. Appl. Microbiol.* **2012**, *35*, 270-277.
